# Supplementary material
Source: PubMed Central journal article supplement (PMC7241652)
Supplement: NIHMS1542045-supplement-7.pdf [file NIHMS1542045-supplement-7.pdf]

**Table S1. Related to Figure 6. Significant oncogenes from Monte Carlo skewing analysis.**

| <b>Cancer</b>        | <b>Gene</b> | <b>Amplified Samples</b> | <b>Skew</b> | <b>Putative enhancers (recurrence)</b> | <b>Additional cancer genes</b> |
|----------------------|-------------|--------------------------|-------------|----------------------------------------|--------------------------------|
| Neuroblastoma        | MYCN        | 39                       | 3'          | SE (4/12)                              | No                             |
| Wilms tumor          | MYCN        | 14                       | 5'          | 2 SEs* (3/5, 4/5)                      | No                             |
| Medulloblastoma      | MYC         | 28                       | 5'          | SE (2/2)                               | No                             |
| Glioblastoma         | EGFR        | 174                      | 5'          | 2 Es (26/41, 31/41)                    | No                             |
| Hepatocellular       | CCND1       | 9                        | 5'          | None (0/1)                             | No                             |
| Glioblastoma         | CDK4        | 64                       | 3'          | E (29/41)                              | No                             |
| Glioblastoma         | MDM4        | 27                       | 5'          | None (0/41)                            | No                             |
| Breast               | FGFR1       | 39                       | 5'          | SE (26/43)                             | ZNF703 <sup>‡</sup>            |
| Bladder              | MDM2        | 11                       | 3'          | E (2/3)                                | FRS2                           |
| Head & Neck Squamous | CCND1       | 51                       | 3'          | SE (3/14), 2 Es (13/14, 14/14)         | CTTN                           |
| Lung Squamous        | CCND1       | 39                       | 3'          | E (1/1)                                | CTTN                           |
| Breast               | CCND1       | 38                       | 3'          | SE (22/43)                             | CTTN <sup>‡</sup>              |
| Glioblastoma         | FIP1L1      | 18                       | 3'          | SE (9/41), 2 Es (34/41, 35/41)         | PDGFRA                         |
| Glioblastoma         | KIT         | 22                       | 5'          | 2 Es (27/41, 30/41)                    | PDGFRA <sup>‡</sup>            |
| Breast               | RARA        | 9                        | 5'          | SE (23/43), 2 Es (38/41, 31/41)        | HER2                           |

Table S2. Related to Figures 1, 4, and 5. Oligonucleotides used in this study.

| Oligonucleotide Purpose      | Name                                 | Sequence                                                                   |
|------------------------------|--------------------------------------|----------------------------------------------------------------------------|
| 4C adapter                   | EGFR TSS upstream reading            | AATGATACGGCGACCCGGAACACTCTTTCCCTACACGACGCTCTTCCGATCTGGTTCAACAACCCGTGATC    |
| 4C adapter                   | EGFR TSS upstream reading GA index   | AATGATACGGCGACCCGGAACACTCTTTCCCTACACGACGCTCTTCCGATCTGAGGTTCAACAACCCGTGATC  |
| 4C adapter                   | EGFR TSS upstream reading AT index   | AATGATACGGCGACCCGGAACACTCTTTCCCTACACGACGCTCTTCCGATCTATGTTTCAACAACCCGTGATC  |
| 4C adapter                   | EGFR TSS upstream non-reading        | CAAGCAGAAGACGGGATACGATCACACATTGGCTTCAAAGT                                  |
| 4C adapter                   | EGFR TSS downstream reading          | AATGATACGGCGACCCGGAACACTCTTTCCCTACACGACGCTCTTCCGATCTTCTTCCGTCTAGTGATC      |
| 4C adapter                   | EGFR TSS downstream reading GA index | AATGATACGGCGACCCGGAACACTCTTTCCCTACACGACGCTCTTCCGATCTGAGGTTTCCCGTCTAGTGATC  |
| 4C adapter                   | EGFR TSS downstream reading AT index | AATGATACGGCGACCCGGAACACTCTTTCCCTACACGACGCTCTTCCGATCTATTTCTCCGTCTAGTGATC    |
| 4C adapter                   | EGFR TSS downstream non-reading      | CAAGCAGAAGACGGGATACGATCACACATTGAGTCCTAA                                    |
| 4C adapter                   | CRE2 reading                         | AATGATACGGCGACCCGGAACACTCTTTCCCTACACGACGCTCTTCCGATCTTCTCAGTAAGTGTGGATC     |
| 4C adapter                   | CRE2 reading GA index                | AATGATACGGCGACCCGGAACACTCTTTCCCTACACGACGCTCTTCCGATCTGATTTCTCAGTAAGTGTGGATC |
| 4C adapter                   | CRE2 reading AT index                | AATGATACGGCGACCCGGAACACTCTTTCCCTACACGACGCTCTTCCGATCTATTTCTCAGTAAGTGTGGATC  |
| 4C adapter                   | CRE2 non-reading                     | CAAGCAGAAGACGGGATACGATCACAAAACTACATTTCCAGGG                                |
| 4C adapter                   | CRE1 reading                         | AATGATACGGCGACCCGGAACACTCTTTCCCTACACGACGCTCTTCCGATCTCCTCAAGGGGACAGAGGATC   |
| 4C adapter                   | CRE1 reading GA index                | AATGATACGGCGACCCGGAACACTCTTTCCCTACACGACGCTCTTCCGATCTGACCTCAAGGGGACAGAGGATC |
| 4C adapter                   | CRE1 reading AT index                | AATGATACGGCGACCCGGAACACTCTTTCCCTACACGACGCTCTTCCGATCTATCCTCAAGGGGACAGAGGATC |
| 4C adapter                   | CRE1 non-reading                     | CAAGCAGAAGACGGGATACGATCACATAAGCAAGGTCACT                                   |
| 4C adapter                   | 5' CTCF site reading                 | AATGATACGGCGACCCGGAACACTCTTTCCCTACACGACGCTCTTCCGATCTCTGTTTGTAGTCCCCGATC    |
| 4C adapter                   | 5' CTCF site reading GA index        | AATGATACGGCGACCCGGAACACTCTTTCCCTACACGACGCTCTTCCGATCTGAGGTTTGTAGTCCCCGATC   |
| 4C adapter                   | 5' CTCF site reading AT index        | AATGATACGGCGACCCGGAACACTCTTTCCCTACACGACGCTCTTCCGATCTATCTGTTTGTAGTCCCCGATC  |
| 4C adapter                   | 5' CTCF site non-reading             | CAAGCAGAAGACGGGATACGAAAGACCAGGTTAATCTCCAT                                  |
| qRT-PCR Primer               | EGFR forward                         | GCCTCCAGGATGTTCAATAA                                                       |
| qRT-PCR Primer               | EGFR reverse                         | TGAGGGCAATGAGGACATAAC                                                      |
| qRT-PCR Primer               | SQLE forward                         | GCCTGACAGAATAGTTGGAGAA                                                     |
| qRT-PCR Primer               | SQLE reverse                         | TACAACCTGGGCATCAAGAC                                                       |
| qRT-PCR Primer               | TBP forward                          | GCTGGCCCATAGTGATCTTT                                                       |
| qRT-PCR Primer               | TBP reverse                          | CATCTCCAGCACACTCTTCTC                                                      |
| CRISPRi sgRNA                | EGFR enhancer 1 gRNA 1 forward       | ACCGGCTGAATAAGAGAGCACAGA                                                   |
| CRISPRi sgRNA                | EGFR enhancer 1 gRNA 1 reverse       | AAACTCTGTGCTCTTATTACAGC                                                    |
| CRISPRi sgRNA                | EGFR enhancer 1 gRNA 2 forward       | ACCGGGACTCGAATCACTGCAG                                                     |
| CRISPRi sgRNA                | EGFR enhancer 1 gRNA 3 reverse       | AAACCTGCAAGTATTGCGAGTCCG                                                   |
| CRISPRi sgRNA                | EGFR enhancer 1 gRNA 3 forward       | ACCGAGGGCCGTGCTCTCAAGA                                                     |
| CRISPRi sgRNA                | EGFR enhancer 1 gRNA 3 reverse       | AAACTCTTTGACGAGCACGGCCCT                                                   |
| CRISPRi sgRNA                | EGFR enhancer 1 gRNA 4 forward       | ACCGATCAGCACGCCGTGGCGTCC                                                   |
| CRISPRi sgRNA                | EGFR enhancer 1 gRNA 4 reverse       | AAACGACGCCACGGCGTGCTGAT                                                    |
| CRISPRi sgRNA                | EGFR enhancer 1 gRNA 5 forward       | ACCGCTGGAAGTAACGGGGAAGAG                                                   |
| CRISPRi sgRNA                | EGFR enhancer 1 gRNA 5 reverse       | AAACCTCTTCCCCGTTACTTCCAG                                                   |
| CRISPRi sgRNA                | EGFR enhancer 2 gRNA 1 forward       | ACCGATTAACCTTAGGTACGGCGGA                                                  |
| CRISPRi sgRNA                | EGFR enhancer 2 gRNA 1 reverse       | AAACTCGCGCTGACCTAAGTTAAT                                                   |
| CRISPRi sgRNA                | EGFR enhancer 2 gRNA 2 forward       | ACCGGGTCTTCCGGCGTGCTGT                                                     |
| CRISPRi sgRNA                | EGFR enhancer 2 gRNA 2 reverse       | AAACACACACGCCCCGGAACCC                                                     |
| CRISPRi sgRNA                | EGFR enhancer 2 gRNA 3 forward       | ACCGCCTTACTGAGCCTGGCGCT                                                    |
| CRISPRi sgRNA                | EGFR enhancer 2 gRNA 3 reverse       | AAACAGCGCCAGGCTCAGTAATGG                                                   |
| CRISPRi sgRNA                | EGFR promoter gRNA 1 forward         | ACCGAGCGATGCGACCCCTCCGGGA                                                  |
| CRISPRi sgRNA                | EGFR promoter gRNA 1 reverse         | AAACTCCCGGAGGGTTCGCATCGCT                                                  |
| CRISPRi sgRNA                | EGFR promoter gRNA 2 forward         | ACCGTCCAGTATTGATCGGGAGAG                                                   |
| CRISPRi sgRNA                | EGFR promoter gRNA 3 reverse         | AAACCTCTCCCGATCAACTACTGGA                                                  |
| CRISPRi sgRNA                | EGFR promoter gRNA 3 forward         | ACCGGACGACAGGCCAAGCTCGTCCG                                                 |
| CRISPRi sgRNA                | EGFR promoter gRNA 3 reverse         | AAACCGGACGAGGTGGCCTGTCTGC                                                  |
| CRISPRi sgRNA                | EGFR promoter gRNA 4 forward         | ACCGCCAGTATTGATCGGGAGAGC                                                   |
| CRISPRi sgRNA                | EGFR promoter gRNA 4 reverse         | AAACGCTCTCCGATCAATACTGG                                                    |
| CRISPRi sgRNA                | SQLE promoter gRNA 1 forward         | ACCGCCCGGAGGGATGCTGGTGA                                                    |
| CRISPRi sgRNA                | SQLE promoter gRNA 1 reverse         | AAACTCACAGCATCCCTCGCGGG                                                    |
| CRISPRi sgRNA                | SQLE promoter gRNA 2 forward         | ACCGGAAACCACTTTTATCGGT                                                     |
| CRISPRi sgRNA                | SQLE promoter gRNA 2 reverse         | AAACACCGATAAAAAGGTGGTTTCC                                                  |
| CRISPRi sgRNA                | SQLE promoter gRNA 3 forward         | ACCGCCGCATCTGAGGGAGGTAC                                                    |
| CRISPRi sgRNA                | SQLE promoter gRNA 3 reverse         | AAACGTACTCTCCATCAGATGGCGG                                                  |
| CRISPRi sgRNA                | SQLE promoter gRNA 4 forward         | ACCGGCAAAACGGGAGGCTCTAA                                                    |
| CRISPRi sgRNA                | SQLE promoter gRNA 4 reverse         | AAACTTAGAGGCTTCCGTTTCGC                                                    |
| CRISPRi sgRNA                | SQLE promoter gRNA 5 forward         | ACCGTCTTTTGTGGAGAGGGCT                                                     |
| CRISPRi sgRNA                | SQLE promoter gRNA 5 reverse         | AAACACGCTTCTCAACAAAAGA                                                     |
| CRISPRi sgRNA                | SQLE promoter gRNA 6 forward         | ACCGGGGAGGCTCTAAATCTTT                                                     |
| CRISPRi sgRNA                | SQLE promoter gRNA 6 reverse         | AAACAAGATTAGAGGCTCCCG                                                      |
| CRISPRi library prep primers | Primer 1                             | AATGATACGGCGACCCGAGATCTACACAATTTCTGGGTAGTTTGCAGT                           |
| CRISPRi library prep primers | Primer 2                             | CAAGCAGAAGACGGGATACGAGAT (Index) GACTCGGTGCCACTTTTCAA                      |
| CRISPRi custom sequencing    | Read 1                               | GATTTCTTGCTTTATATATCTTGTGGAAAGGACGAAACACCG                                 |
| CRISPRi custom sequencing    | Read 2                               | GTTGATAACGGACTAGCCTTATTTTAACTTGCTATTTCTAGCTCTAAAAC                         |
| CRISPRi custom sequencing    | Index                                | GCTAGTCGGTATCAACTTGAAAAGTGGCACCAGTC                                        |
