# Supplementary material
Source: PubMed Central journal article supplement (PMC7241652)

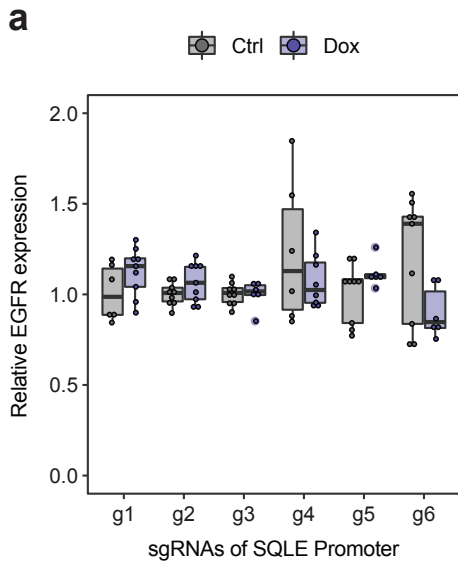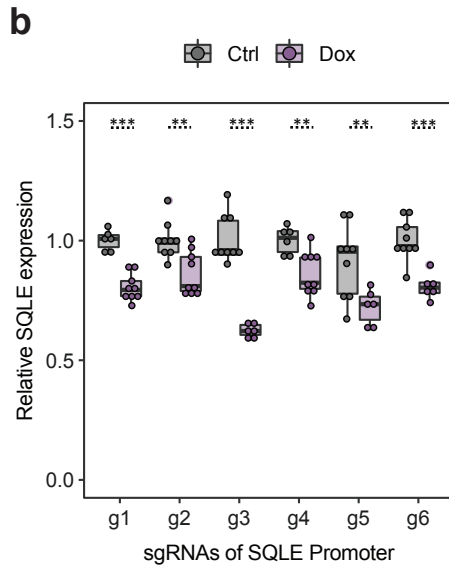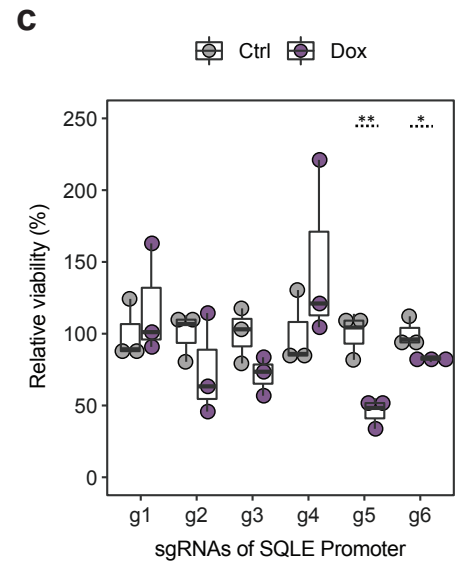

Supplement: NIHMS1542045-supplement-1.pdf [file NIHMS1542045-supplement-1.pdf]

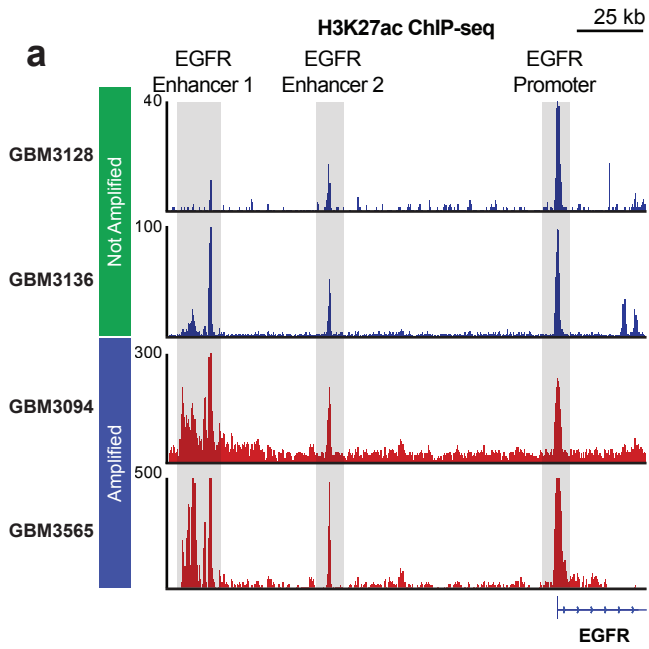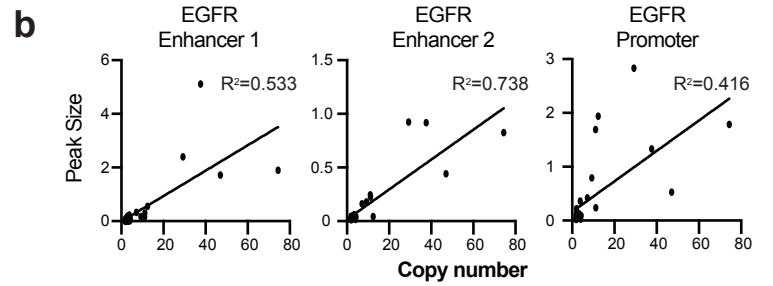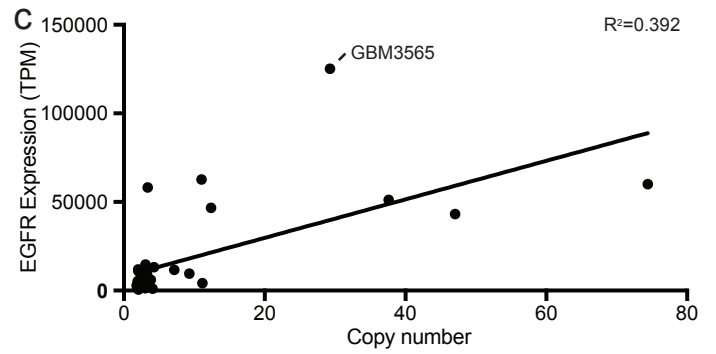

Supplement: NIHMS1542045-supplement-2.pdf [file NIHMS1542045-supplement-2.pdf]

**a**

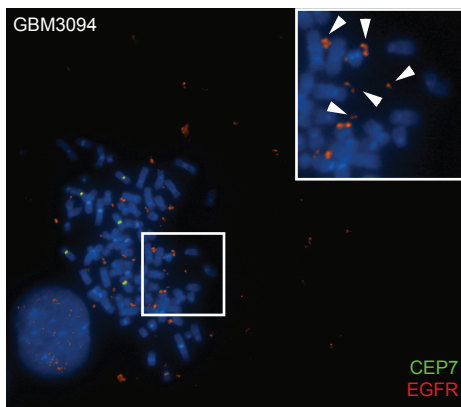

**b**

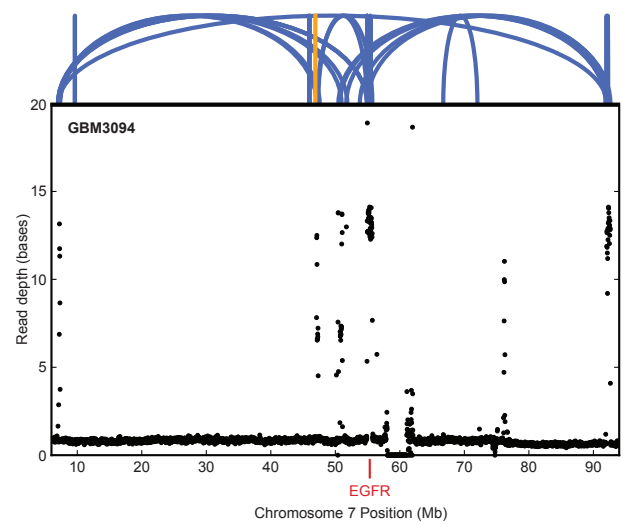

Supplement: NIHMS1542045-supplement-3.pdf [file NIHMS1542045-supplement-3.pdf]

**a**

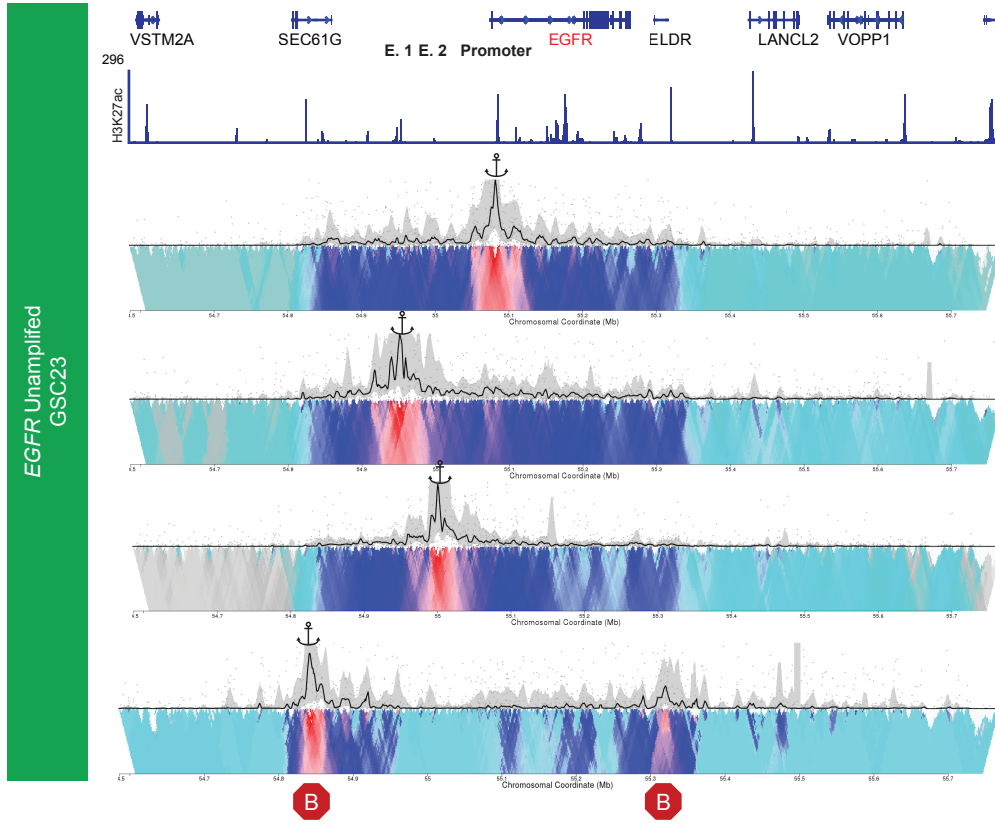

**b**

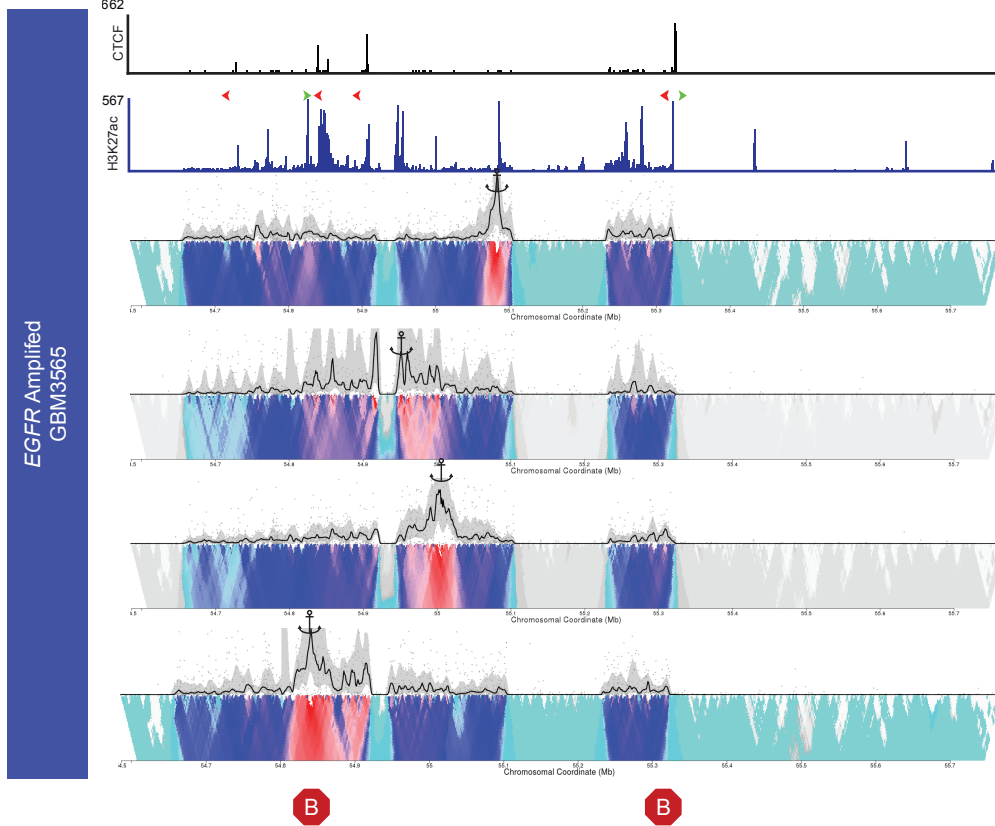

Supplement: NIHMS1542045-supplement-4.pdf [file NIHMS1542045-supplement-4.pdf]

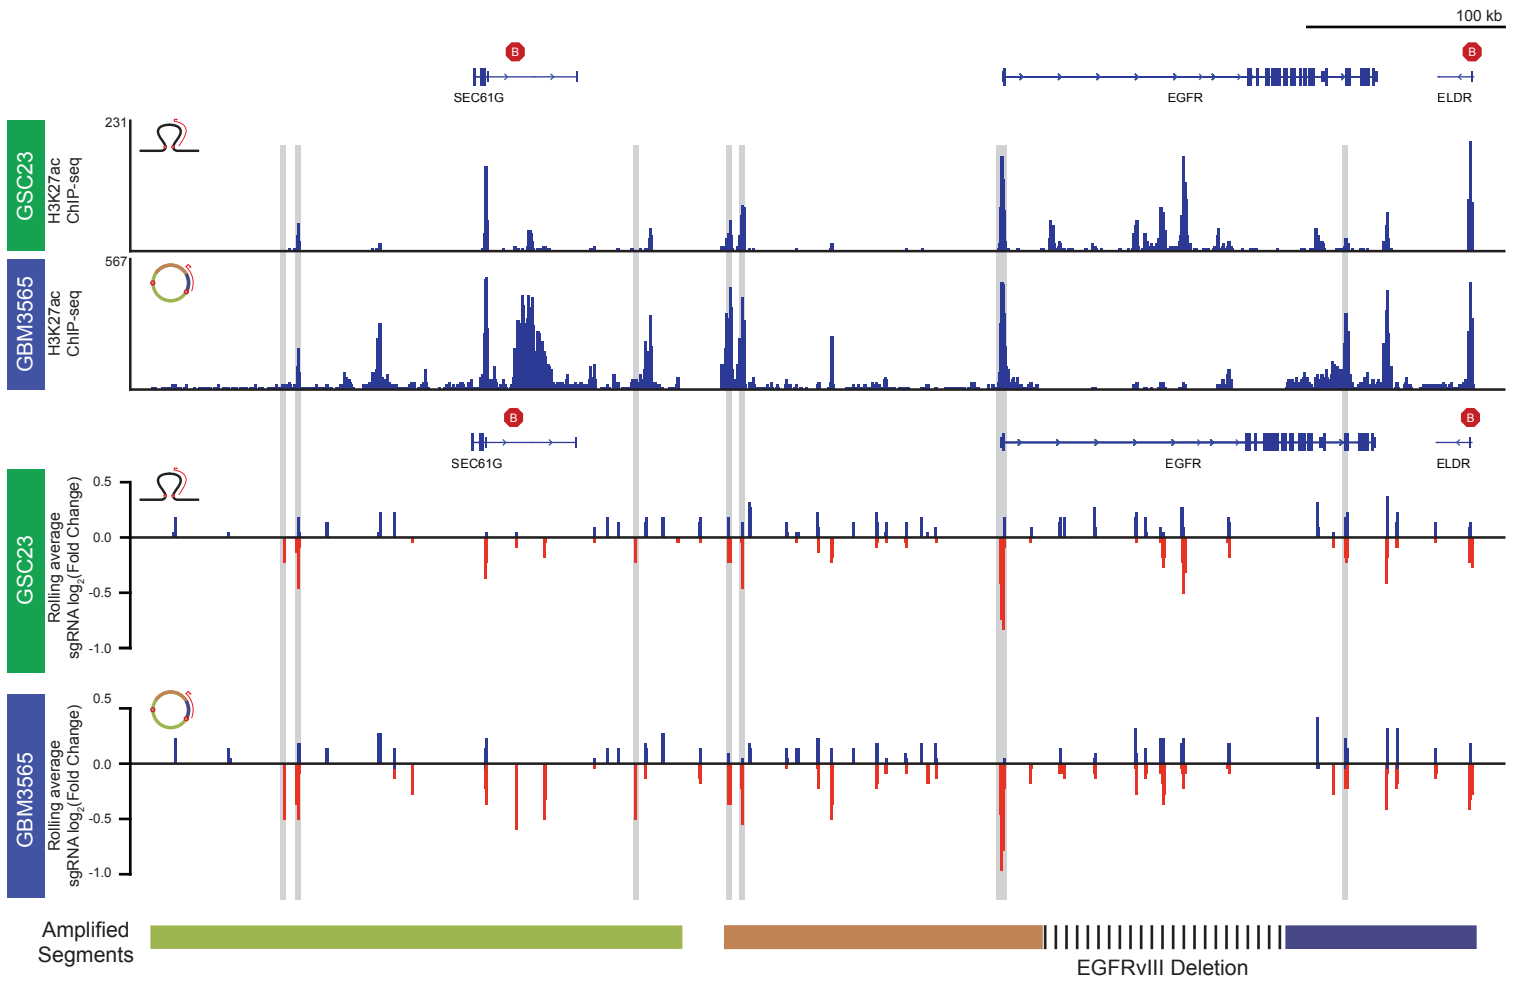

Supplement: NIHMS1542045-supplement-5.pdf [file NIHMS1542045-supplement-5.pdf]

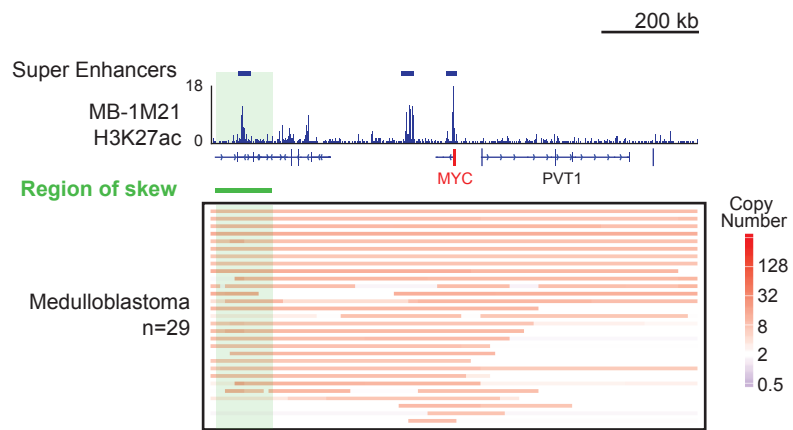

Supplement: NIHMS1542045-supplement-6.pdf [file NIHMS1542045-supplement-6.pdf]
